# Supplementary material
Source: MDPI journal article supplement (https://www.mdpi.com/1999-4907/7/10/221)
Supplement: s1 [file s1]

Supplementary Material: Soil CO2 Efflux and Root Productivity in a Switchgrass and Loblolly Pine Intercropping System

Paliza Shrestha, John R. Seiler, Brian D. Strahm, Eric B. Sucre and Zakiya H. Leggett


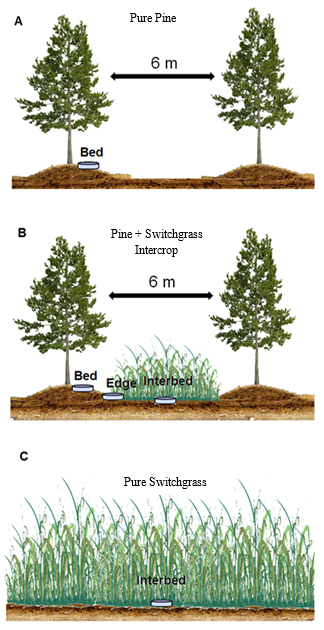


**Figure S1.** A conceptual diagram representingmain treatments: (**A**) pure pine: bed (P-B); (**B**) pine + switchgrass intercrop: bed (PSG-B), edge (PSG-E), interbed (PSG-I); (**C**) pure switchgrass (SG).

Pine + Switchgrass Intercrop

Pure Switchgrass

**Figure S2.** Mean soil moisture (in the top 12 cm) between 10 January 2012 to 19 January 2013 in a four-year-old switchgrass and loblolly pine agroforestry system on the lower coastal plain of North Carolina. Error bars represent ± 1 standard error from the mean. Stars indicate sampling dates with significant differences between treatments as determined using repeated measures analysis (α = 0.05). The accompanying matrix represents mean separation using Tukey-Kramer HSD where different letters within each treatment date indicate significant differences at *p* < 0.05 where P = pine, SG = flat planted switchgrass, and PSG = pine intercropped with switchgrass. Additional treatment designations indicate the microtopographical position of the sample location where B = bedded row, I = interbed space, and E = edge where an aboveground transition from switchgrass to pine can be observed.
